# Supplementary material for: Comprehensive Knowledge and Preparedness among Dental Community to Confront COVID-19—A Multicentric Cross-Sectional Study
Source: MDPI journal article supplement (doi:10.3390/ijerph19010210), 2021-12-25
Supplement: s1 [file s1]

## Questionnaire

| S1<br>No. | Demographic Details                |                                                                                                                                                                                                                                                                                                                               |
|-----------|------------------------------------|-------------------------------------------------------------------------------------------------------------------------------------------------------------------------------------------------------------------------------------------------------------------------------------------------------------------------------|
| 1.        | Age Group                          | a. Less than 20<br>b. 20-29 years<br>c. 30-39 years<br>d. 40-49 years<br>e. >50 years                                                                                                                                                                                                                                         |
| 2.        | Gender                             | a. Male<br>b. Female                                                                                                                                                                                                                                                                                                          |
| 3.        | Duration of practice               | a. <5 years<br>b. 5-15 years<br>c. >15 years                                                                                                                                                                                                                                                                                  |
| 4.        | City of practice                   |                                                                                                                                                                                                                                                                                                                               |
| 5.        | Occupation                         | <b>General Dentist</b><br><b>Dental Specialist</b><br>a. Oral medicine<br>b. Pedodontics<br>c. Periodontics<br>d. Prosthodontics<br>e. Restorative dentistry<br>f. Oral Surgery<br>g. Oral Pathology<br><br><b>Dental Student</b><br>a. Pre-clinical course<br>b. Clinical course<br>c. Interns<br>d. Post-graduate and above |
| 6.        | Organization                       | a. Private sector<br>b. Public sector<br>c. University Clinics                                                                                                                                                                                                                                                                |
| 7.        | Educational status                 | a. BDS<br>b. MDS<br>c. Doctoral (PhD)                                                                                                                                                                                                                                                                                         |
| 8.        | Training taken (Infection control) | a. Yes<br>b. No                                                                                                                                                                                                                                                                                                               |
| 9.        | Training taken (COVID-19)          | a. Yes<br>b. No                                                                                                                                                                                                                                                                                                               |

|                        |                                                                                                                              |                                                                                                                                                                                                                                                                                                      |
|------------------------|------------------------------------------------------------------------------------------------------------------------------|------------------------------------------------------------------------------------------------------------------------------------------------------------------------------------------------------------------------------------------------------------------------------------------------------|
| <b>10. Nationality</b> |                                                                                                                              |                                                                                                                                                                                                                                                                                                      |
| Sl No.                 | <b>Knowledge Questions</b>                                                                                                   |                                                                                                                                                                                                                                                                                                      |
| 1.                     | <b>Which of the following is the best way to prevent COVID-19?</b>                                                           | a. Washing hands<br>b. Wearing mask<br>c. Using gloves<br>d. Using disinfectant                                                                                                                                                                                                                      |
| 2.                     | <b>In which the following case is the virus alive more?</b>                                                                  | a. Steel and metal surfaces<br>b. Body skin<br>c. Clothing surface<br>d. Water                                                                                                                                                                                                                       |
| 3.                     | <b>Which ones are the main symptoms of COVID-19?</b>                                                                         | a. The feeling of pain or constant pressure in the chest<br>b. Difficulty in breathing or shortness of breath<br>c. Bruising of the lips or face<br>d. Confusion and irritability as a new event<br>e. Loss of sense of taste or smell<br>f. Gastrointestinal symptoms such as diarrhea and vomiting |
| 4.                     | <b>What is the most definitive diagnostic procedure of COVID-19?</b>                                                         | a. Chest CT<br>b. Ultrasound<br>c. PCR<br>d. Urine sample                                                                                                                                                                                                                                            |
| 5.                     | <b>When should the N95 mask's valve be closed?</b>                                                                           | a. During inhaling<br>b. During exhaling<br>c. both states                                                                                                                                                                                                                                           |
| 6.                     | <b>What is the best and most effective way to disinfect surfaces in dental offices and clinics?</b>                          | a. Disinfectants with alcohol 70%<br>b. Quaternary ammonium<br>c. Sodium hypochlorite with a concentration below 0.5%                                                                                                                                                                                |
| 7.                     | <b>In case of a lack of facilities, which of the following cases is necessary to reduce the transmission of coronavirus?</b> | a. Long-sleeve and waterproof cover<br>b. Surgical cap and gloves<br>c. FFP2 or N95 standard mask or their equivalent<br>d. Eye care equipment (shield or safety glasses)                                                                                                                            |
| 8.                     | <b>Which group of patients do you think should avoid coming to the dental offices during the</b>                             | a. Children<br>b. Elderly<br>c. Breastfeeding and pregnant women                                                                                                                                                                                                                                     |

|     |                                                                                                      |                                                                                                                                |
|-----|------------------------------------------------------------------------------------------------------|--------------------------------------------------------------------------------------------------------------------------------|
|     | <b>corona pandemic, except during emergencies?</b>                                                   | d. People with systemic problems                                                                                               |
| 9.  | <b>Rate of spread of which disease is the highest?</b>                                               | a. COVID19<br>b. H1N1<br>c. Measles<br>d. HIV                                                                                  |
| 10. | <b>Which one has the most effective role in reducing the prevalence of corona?</b>                   | a. Social distancing<br>b. Cleansing the surface<br>c. Airway protection<br>d. Disinfecting the nasal passage by normal saline |
| 11. | <b>What is the main route of the contagion of the SARS-COV2 virus?</b>                               | a. Blood<br>b. Breathing<br>c. Oral-fecal<br>d. Skin contact                                                                   |
| 12. | <b>What is the appropriate distance between people to prevent the contagion of COVID-19?</b>         | a. At least 1 meter<br>b. At least 3 meters<br>c. At least 2 meters<br>d. People should not have contact                       |
| 13. | <b>What is the best kind of gloves for resistance against coronavirus?</b>                           | a. Latex<br>b. Vinyl<br>c. Nitrile<br>d. Nylon                                                                                 |
| 14. | <b>In general, for how long are the N95 and FFP2 filter masks useful?</b>                            | a. 1 hour<br>b. 8 hours<br>c. 24 hours<br>d. One week                                                                          |
| 15. | <b>Is it necessary to use any pre procedural mouthwash while treating patients during COVID- 19?</b> | a. Yes<br>b. No<br>c. I don't know<br>d. Please specify the name of the mouthwash.....                                         |
| 16. | <b>Is it necessary to use a protective shield while treating patients?</b>                           | a. Yes<br>b. No<br>c. I don't know                                                                                             |
| 17. | <b>Is it necessary to wash our hands before wearing gloves?</b>                                      | a. Yes<br>b. No<br>c. I don't know                                                                                             |
| 18. | <b>How long do you take to wash your hands?</b>                                                      | a. I don't wash hands before wearing gloves<br>b. Less than 2 minutes<br>c. 2-5 minutes                                        |

|           |                                                                                                           |                                                                                                                                                                                                                                                                                                                                                                                                                       |
|-----------|-----------------------------------------------------------------------------------------------------------|-----------------------------------------------------------------------------------------------------------------------------------------------------------------------------------------------------------------------------------------------------------------------------------------------------------------------------------------------------------------------------------------------------------------------|
|           |                                                                                                           | d. 5 minutes or more                                                                                                                                                                                                                                                                                                                                                                                                  |
| 19.       | <b>How often do you change mouth masks?</b>                                                               | a. After every patient<br>b. When mask is damaged<br>c. After every session<br>d. When mask is dampened                                                                                                                                                                                                                                                                                                               |
| Sl<br>No. | <b>Preparedness Questions</b>                                                                             |                                                                                                                                                                                                                                                                                                                                                                                                                       |
| 1.        | <b>Personal protection measures</b>                                                                       | a. Social distancing (avoid personal contact)<br>b. Hand hygiene (washing hands more often)<br>c. Use face mask (cover nose)<br>d. Avoid travel to infected area or country<br>e. Avoid visiting wet markets, raw and under cooked animal products<br>f. Use different chopping board and knives for raw meat and other food<br>g. Avoid purchasing things made in china<br>h. Avoid vegetarian food<br>i. Don't know |
| 2.        | <b>Treatment available for COVID-19</b>                                                                   | a. No treatment/vaccine till date<br>b. Supportive treatment<br>c. Just keep yourself safe<br>d. Vaccination<br>e. Don't know                                                                                                                                                                                                                                                                                         |
| 3.        | <b>Preparedness to fight against COVID-19</b>                                                             | a. Avoiding mass gathering and traveling to suspected area<br>b. Using hand sanitizer, face mask, home cleaning materials recent days<br>c. Spending 20 s thoroughly for washing hands now a days<br>d. Maintaining food hygiene<br>e. Stored food items and basic required things in home as its lockdown<br>f. Ready to visit hospital immediately if needed                                                        |
| 4.        | <b>Do you need more information about prevention of COVID 19?</b>                                         | a. Yes<br>b. No                                                                                                                                                                                                                                                                                                                                                                                                       |
| 5.        | <b>In terms of infection control, how did/should you prepare yourself to deal with COVID-19 infection</b> | a. Check adequate supplies of goggles, masks, and gowns on hand for emergencies.                                                                                                                                                                                                                                                                                                                                      |

|     |                                                                                                                             |                                                                                                                                                                                                                                                                                                                                                                                                                                                                                                                                                                   |
|-----|-----------------------------------------------------------------------------------------------------------------------------|-------------------------------------------------------------------------------------------------------------------------------------------------------------------------------------------------------------------------------------------------------------------------------------------------------------------------------------------------------------------------------------------------------------------------------------------------------------------------------------------------------------------------------------------------------------------|
|     |                                                                                                                             | <ul style="list-style-type: none"> <li>b. Links to or contact External Resource Centers for COVID-19 (Coronavirus) (CDC, WHO etc.).</li> <li>c. Check patient care equipment, including portable ventilators.</li> <li>d. Recommendations for infection control to help biomedical and clinical engineers.</li> <li>e. Check alternative suppliers of certain personal protective equipment.</li> <li>f. Prepared the list to supply chain professionals.</li> <li>g. Do not need any preparation.</li> <li>h. I don't know.</li> </ul>                           |
| 6.  | <b>Dentist should provide adequate training to their staff to promote many levels of screening and preventive measures.</b> | <ul style="list-style-type: none"> <li>a. Agree</li> <li>b. Disagree</li> <li>c. Do not know</li> </ul>                                                                                                                                                                                                                                                                                                                                                                                                                                                           |
| 7.  | <b>What precautions should the dental practitioners take when treating COVID-19-positive patients?</b>                      | <ul style="list-style-type: none"> <li>a. Airborne infection isolation rooms (AIIRs) should be reserved for patients</li> <li>b. Air from these rooms should be extracted directly by high-efficiency particulate air (HEPA) filter</li> <li>c. Pre-procedural mouth rinse with 0.2% povidone iodine</li> <li>d. Extra-oral imaging should be preferred to intra-oral imaging</li> <li>e. Rubber dam should be used to minimize splatter generation</li> <li>f. Minimize the use of ultrasonic instruments, high-speed handpieces, and 3-way syringes.</li> </ul> |
| 8.  | <b>Do you know whom to contact if you have an unprotected exposure to a known or suspected COVID-19 patient?</b>            | <ul style="list-style-type: none"> <li>a. Yes</li> <li>b. No</li> </ul>                                                                                                                                                                                                                                                                                                                                                                                                                                                                                           |
| 9.  | <b>Do you know what to do if you have signs or symptoms suspected of COVID-19 infection?</b>                                | <ul style="list-style-type: none"> <li>a. Yes</li> <li>b. No</li> </ul>                                                                                                                                                                                                                                                                                                                                                                                                                                                                                           |
| 10. | <b>During COVID-19 pandemic, how do you recap the needle after use?</b>                                                     | <ul style="list-style-type: none"> <li>a. One handed recapping</li> <li>b. Two handed recapping</li> <li>c. I do not recap a used needle</li> </ul>                                                                                                                                                                                                                                                                                                                                                                                                               |

|     |                                                                                                                                 |                                                                                                                                   |
|-----|---------------------------------------------------------------------------------------------------------------------------------|-----------------------------------------------------------------------------------------------------------------------------------|
| 11. | <b>How many needle-stick injuries have you had since COVID-19 pandemic?</b>                                                     | a. 1–5<br>b. 6–10<br>c. > 10<br>d. Not applicable                                                                                 |
| 12. | <b>During COVID-19 pandemic, is it advised to encourage the wound to bleed as the initial action following sharp injury?</b>    | a. Yes<br>b. No<br>c. Don't know                                                                                                  |
| 13. | <b>During COVID-19 pandemic, what actions do you most commonly take following a needle stick or sharp injury in the clinic?</b> | a. Ignore and continue Replace gloves<br>b. replace needle<br>c. Inform nurse/supervisor<br>d. Follow each step of college policy |
| 14. | <b>Are you aware of your college sharps policy and procedures?</b>                                                              | a. Fully aware of policy and procedures<br>b. Aware policy exists but unaware of procedures<br>c. Unaware of policy or procedures |
